# Klumpfuss controls FMRFamide expression by enabling BMP signaling within the NB5-6 lineage

María Losada-Pérez<sup>1</sup>, Hugo Gabilondo<sup>1</sup>, Isabel Molina<sup>1</sup>, Enrique Turiegano<sup>1</sup>, Laura Torroja<sup>1</sup>, Stefan Thor<sup>2</sup> and Jonathan Benito-Sipos<sup>1,\*</sup>

## SUMMARY

A number of transcription factors that are expressed within most, if not all, embryonic neuroblast (NB) lineages participate in neural subtype specification. Some have been extensively studied in several NB lineages (e.g. components of the temporal gene cascade) whereas others only within specific NB lineages. To what extent they function in other lineages remains unknown. Klumpfuss (Klu), the *Drosophila* ortholog of the mammalian Wilms tumor 1 (WT1) protein, is one such transcription factor. Studies in the NB4-2 lineage have suggested that Klu functions to ensure that the two ganglion mother cells (GMCs) in this embryonic NB lineage acquire different fates. Owing to limited lineage marker availability, these observations were made only for the NB4-2 lineage. Recent findings reveal that Klu is necessary for larval neuroblast growth and self-renewal. We have extended the study of Klu to the well-known embryonic NB5-6T lineage and describe a novel role for Klu in the *Drosophila* embryonic CNS. Our results demonstrate that Klu is expressed specifically in the postmitotic Ap4/FMRFa neuron, promoting its differentiation through the initiation of BMP signaling. Our findings indicate a pleiotropic function of Klu in Ap cluster specification in general and particularly in Ap4 neuron differentiation, indicating that Klu is a multitasking transcription factor. Finally, our studies indicate that a transitory downregulation of *klu* is crucial for the specification of the Ap4/FMRFa neuron. Similar to WT1, *klu* seems to have either self-renewal or differentiation-promoting functions, depending on the developmental context.

**KEY WORDS:** *Drosophila*, Klumpfuss, Terminal differentiation, BMP signaling, Neuropeptidergic cell identity, FMRFa

## INTRODUCTION

The nervous system contains a daunting number of cells and a vast diversity of cell types. Neurons differ from each other in many ways, including morphology and the type of neurotransmitters/neuropeptides, receptors and ion channels that they express. Each neuronal subtype needs to be generated at the correct place, precise time, and in the appropriate numbers. The combined effect of vast cell numbers, great diversity and strict fidelity of pattern constitutes the very basis for the enormously complex functions of the nervous system, such as homeostasis, learning/memory and behavior. Understanding neuronal subtype specification continues to be one of the fundamental challenges in neurobiology.

*Drosophila* embryonic ventral nerve cord (VNC) is an important model system for addressing basic mechanisms of nervous system development. It is becoming increasingly clear that most developmental mechanisms are highly conserved across the animal kingdom, and findings in less complex models have been crucial for elucidating the molecular and genetic mechanisms that control nervous system development in higher animals.

To generate neural diversity at the precise time and place required, while establishing the correct connections, *Drosophila* embryonic developing VNC needs to orchestrate the expression of large numbers of regulatory genes with great temporal and spatial precision. The involvement in neural subtype specification of a set of genes that encode transcription factors that are expressed within

most, if not all, embryonic neuroblast (NB) lineages, has been broadly described. Some of these genes are components of the well-known temporal gene cascade, which controls temporal competence changes within NB lineages, generating different cell types at different time points. Nevertheless, the function of other widely expressed transcription factors has only been described within specific NB lineages. Hence, it remains unknown to what extent their functions operate in other lineages. Klumpfuss (Klu) is one such transcription factor. *klu* encodes a protein with four zinc-finger motifs of the C2H2 type, three of which are homologous to those of the proteins of the EGR transcription factor family whereas the fourth is highly homologous to the divergent zinc-finger of mammalian Wilms tumor 1 (WT1) (Klein and Campos-Ortega, 1997). Klu is expressed in most, if not all, embryonic neuroblasts and has been found in GMC-2 of several lineages. Klu has been shown to prevent GMC4-2b from adopting the GMC4-2a fate by repressing *even skipped* (*eve*) expression in GMC4-2b, and loss of *klu* expression leads to a duplication of GMC4-2a fate. Although it is known that Klu does not affect the progeny of GMC4-2a, the role of Klu in later born ganglion mother cells (GMCs) in the NB4-2 lineage has not been examined (Klein and Campos-Ortega, 1997; McDonald et al., 2003; Yang et al., 1997). From these studies it was concluded that *klu* functions within embryonic NB lineages to ensure that each GMC in a lineage acquires a different fate. However, owing to the limited availability of lineage markers, these observations were made only for the NB4-2 lineage. Recent findings pinpoint the importance of Klu as a regulator of self-renewal in larval brain neuroblasts, as overexpression of Klu results in the formation of transplantable brain tumors (Berger et al., 2012; Xiao et al., 2012). Klu is necessary for the maintenance of type I and II larval brain neuroblasts, as *klu* mutant larvae show progressive loss of both types of neuroblasts due to premature differentiation (Berger et al., 2012; Xiao et al., 2012).

<sup>1</sup>Departamento de Biología, Universidad Autónoma de Madrid, Cantoblanco, E 28049 Madrid, Spain. <sup>2</sup>Department of Clinical and Experimental Medicine, Linköping University, SE-581 85 Linköping, Sweden.

\*Author for correspondence (jonathan.benito@uam.es)

We are taking a comprehensive molecular and genetic approach to understanding neuronal subtype specification, using the *Drosophila* embryonic thoracic neuroblast 5-6 (NB5-6T) as a model. This neuroblast can be readily identified by the specific expression of *ladybird early (K)* [*lbe(K)*] reporters (Baumgardt et al., 2009; De Graeve et al., 2004), and is generated in each of the six thoracic VNC hemisegments. Each NB5-6T produces a mixed lineage of 20 cells (Baumgardt et al., 2009). At the end of its lineage, NB5-6T generates directly, without a GMC intermediate, a set of four interneurons, denoted the ‘Ap cluster’, which are defined by expression of the LIM-homeodomain transcription factor Apterous (Ap; mammalian Lhx2a/b) and the transcription co-factor Eyes absent (Eya; mammalian Eya1-4) (Lundgren et al., 2005; Miguel-Aliaga and Thor, 2004). The birth order of each Ap neuron is stereotyped, and the number of the neuron refers to its birth order. The four Ap neurons can be further subdivided into three neuronal subtypes: the Ap1/Nplp1 and Ap4/FMRFa neurons, which express the Nplp1 and FMRFamide [also known as FMRFamide-related (Fmrf) – FlyBase] neuropeptides, respectively, and two ‘generic’ Ap cluster neurons, herein denoted Ap2 and Ap3 (Fig. 1A,B) (Baumgardt et al., 2009; Baumgardt et al., 2007; Benveniste et al., 1998; Park et al., 2004).

To further understand the development of this lineage and the specification of the Ap neurons, we have conducted a ‘targeted screen’ (Gabilondo et al., 2011) of genes expressed in the VNC (Brody et al., 2002) that alter the FMRFa pattern when mutated. One of the mutants identified in this screen by loss of FMRFa expression was *klu*. Here, we identify a novel role for Klu in the *Drosophila* embryonic CNS. Our results demonstrate that Klu is expressed specifically in the Ap4/FMRFa neuron, where it selectively controls BMP signaling by regulating BMP type I receptors. Our results indicate a pleiotropic function of Klu in Ap cluster specification in general and particularly in Ap4 neuron differentiation, demonstrating that Klu is a multitasking transcription factor. Finally, our studies also indicate that a transitory downregulation of *klu* is pivotal for the specification of the Ap4/FMRFa neuron.

## MATERIALS AND METHODS

### Fly stocks

Fly stocks were raised and crosses were performed at 25°C on standard medium. The following fly mutant alleles were used: *sqz<sup>2c</sup>* (Allan et al., 2003); *ap<sup>md544</sup>* (referred to as *ap-Gal4*) (O’Keefe et al., 1998); *cas<sup>d1</sup>* [provided by W. Odenwald, NINDS, National Institutes of Health, Bethesda, USA (Mellerick et al., 1992)]; *grh<sup>IM</sup>* (Nusslein-Volhard et al., 1984); *klu<sup>212IR51C</sup>* [provided by W. Chia (Cheah et al., 2000; Yang et al., 1997)]; *col<sup>1</sup>/col<sup>3</sup>* (Crozatier and Vincent, 1999) (provided by A. Vincent, CNRS/Université Paul Sabatier, Toulouse, France); *nab<sup>SH143</sup>/nab<sup>R52</sup>* (provided by F. J. Díaz-Benjumea, CBMSO-UAM, Madrid, Spain) (Terriente Felix et al., 2007); *eya<sup>ClI-III</sup>* (Pignoni et al., 1997); *svp<sup>1</sup>* (Kanai et al., 2005); *gsb<sup>01153</sup>* (referred to as *gsb-lacZ*) (Duman-Scheel et al., 1997), a marker for neuroblast lineages in rows 5 and 6 (Buenzow and Holmgren, 1995; Duman-Scheel et al., 1997; Gutjahr et al., 1993; Skeath et al., 1995); *elav-Gal4* (provided by A. DiAntonio) (DiAntonio et al., 2001); *Df(2R)Pcl7B* (referred to as *grh<sup>Df</sup>*) (Hemphala et al., 2003; Baumgardt et al., 2009); *prospero-Gal4* on chromosome III (F. Matsuzaki, Kobe, Japan) (Isshiki et al., 2001); *wormiu-Gal4* (Albertson and Doe 2003; Lee et al. 2006); *c929-Gal4* (referred to as *dimin-Gal4*) [generated in the laboratory of Dr Kim Kaiser (University of Glasgow, UK) (O’Brien and Taghert, 1998)], *fmrfa-Gal4* (provided by P. Taghert, Washington University, St Louis, MO, USA); *bm-lacZ* (Allan et al., 2003); *slit-Gal4* (provided by Christian Klämbt, University of Münster, Münster, Germany (Albagli et al., 1996); *UAS-gbb*, *UAS-sax<sup>A</sup>*, *UAS-tkv<sup>A</sup>*, *UAS-sax*, *UAS-tkv* (provided by M. O’Connor, University of Minnesota, Minneapolis, USA) (Haerry et al.,

1998); *lbe(K)-Gal4*, a NB 5-6-specific transgenic marker (Baumgardt et al., 2009); *UAS-nmEGFP* (Baumgardt et al., 2009). Mutants were kept over *CyO*, *Act-GFP*; *CyO*, *Dfd-EYFP*; *TM3, Ser*; *Act-GFP*; *CyO*, *twi-Gal4*, *UAS-GFP*; *TM3, Sb, Ser*; *twi-Gal4*, *UAS-GFP*; or *TM6, Sb, Tb, Dfd-EYFP* balancer chromosomes. As wild type, *OregonR* was often used. Unless otherwise stated, flies were obtained from the Bloomington *Drosophila* Stock Center.

### Immunohistochemistry

Antibodies used were: rabbit anti-Klu (1:1000) [provided by X. H. Yang (Yang et al., 1997)]; guinea pig anti-Col (1:1000), guinea pig anti-Dimm (1:1000), chicken anti-proNplp1 (1:1000), rabbit anti-proFMRFa (1:1000) (Baumgardt et al., 2007); mouse anti-Seven up (1:50) (gift of Y. Hiromi, National Institute of Genetics, Mishima, Japan); rabbit anti-pMad (1:500) (41D10, Cell Signaling); mAb Eya10H6 (1:250) (from Developmental Studies Hybridoma Bank). All polyclonal sera were pre-absorbed against pools of early embryos. Secondary antibodies were conjugated with FITC, Rhodamine-RedX or Cy5 and used at 1:500 (Jackson ImmunoResearch). Embryos were dissected in PBS, fixed for 25 minutes in 4% paraformaldehyde, blocked and processed with antibodies in PBS with 0.2% Triton X-100 and 4% donkey serum. Slides were mounted with Vectashield (Vector Labs). Wild-type and mutant embryos were stained and analyzed on the same slide.

### Confocal imaging, data acquisition and staining quantification

A Zeiss META 510 confocal microscope was used to collect data for all fluorescent images; confocal stacks were merged using LSM software (Zeiss) or Adobe Photoshop CS4. Where appropriate, images were false colored for clarity.

### Statistical methods

Statistical calculations were performed using SPSS software (v15.0.1; IBM). For statistical significance, Student’s *t*-test or, in the case of non-Gaussian distribution of variables, a non-parametric Mann-Whitney U-test or  $\chi^2$  test was used. Images and graphs were compiled in Adobe Illustrator.

## RESULTS

### Loss-of-function of *klu* abolishes FMRFa expression in the Ap cluster

To begin dissecting the role of *klu* in the latter part of the NB5-6 lineage, we analyzed the terminal differentiation markers Nplp1 and FMRFa, which are neuropeptides expressed by Ap1 and Ap4, respectively. Whereas Nplp1 expression was largely unaffected in *klu* embryos (Fig. 1F,L,P,Q), we found an almost complete loss of FMRFa in the lateral thoracic areas (Fig. 1G,M,P,Q). Of note, the anterior SE2 FMRFa neurons were completely unaffected (Fig. 1G). Since recent studies showed that loss-of-function of *klu* promotes precocious neuroblast differentiation (Berger et al., 2012; Xiao et al., 2012), we asked whether this putative precocious differentiation could preclude the generation of Ap neurons in the final part of the NB5-6 lineage in *klu* mutants. We utilized Eya and *ap-Gal4>UAS-GFP* markers, which are specific for Ap neurons. In *klu* mutants, we observed four Ap neurons in over 76% of hemisegments (Fig. 1H,L-N,Q), although occasionally (14%) fewer or more than four Ap neurons developed per hemisegment. However, this alteration was not statistically significant (Fig. 1Q). These results suggested that NB lineage progression is not severely affected in *klu* mutants and hence cannot explain the lack of FMRFa in the Ap4 neuron.

We next analyzed expression of the Dimmed (Dimm) basic helix-loop-helix transcription factor, a ‘master gene’ of neuropeptidergic identity (Allan et al., 2005; Hamanaka et al., 2010; Hewes et al., 2003) that is expressed in the Ap1/Nplp1 and Ap4/FMRFa neurons (Park et al., 2008). We found that *klu* mutants display a significant decrease of Dimm expression in the

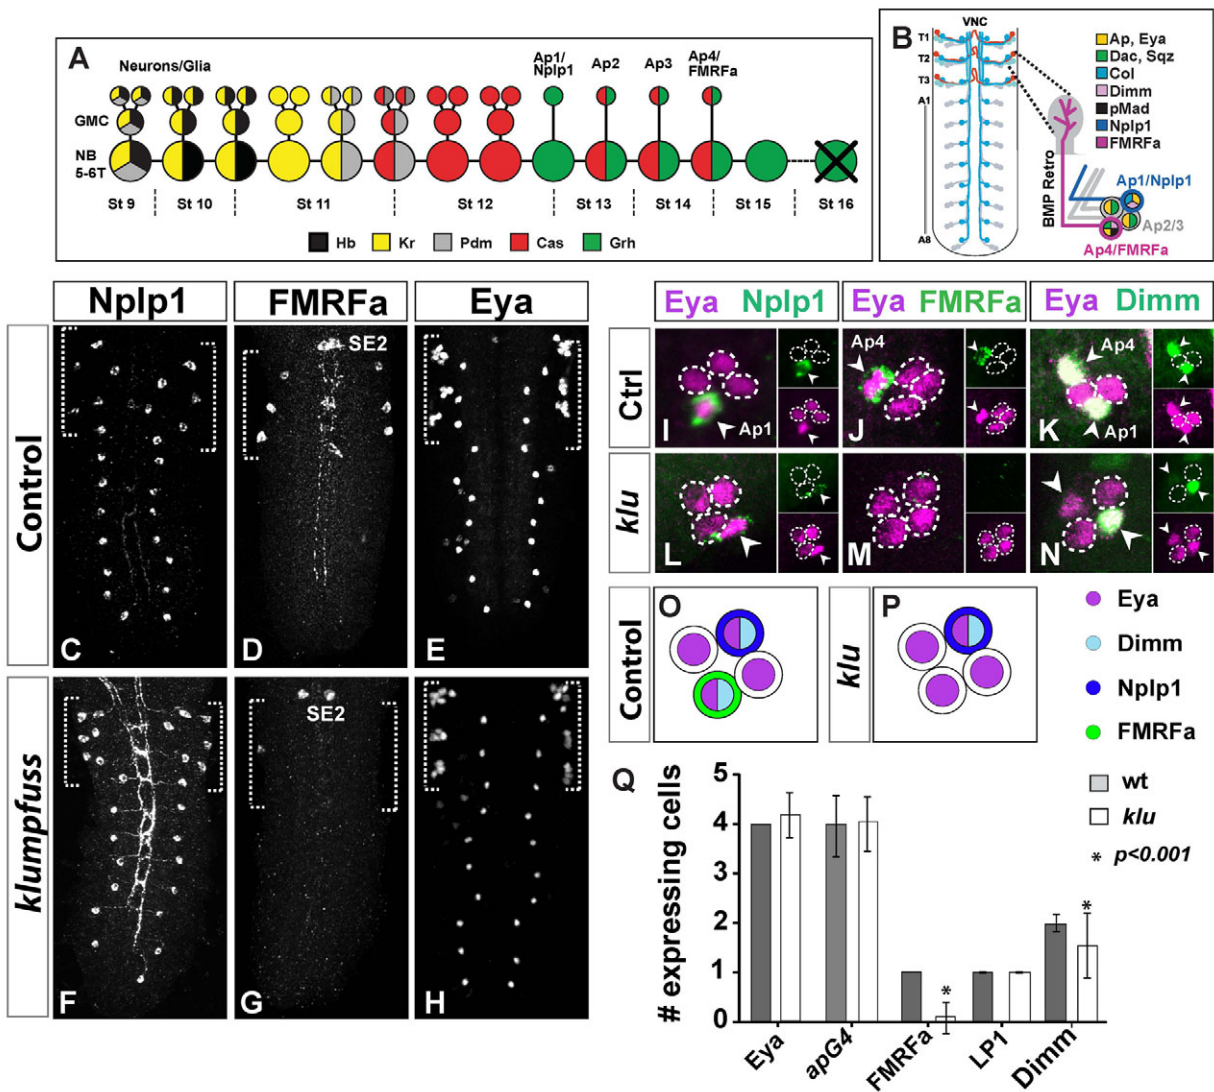

**Fig. 1. *klu* is crucial for Ap4/FMRFa neuron differentiation.** (A) Model of the NB5-6T lineage based on previous studies (Baumgardt et al., 2009). The four Ap cluster neurons are the last-born neurons and are generated without a GMC intermediate. (B) Previous reports identified several regulatory genes that are specifically expressed in subsets of Ap neurons and that act to specify their identities (see text for references). (C-N) Expression of the Ap cluster determinants Eya and Dimm and of the terminal identity markers FMRFa and Nplp1 in control and *klu* mutants. (C-H) Stage 18 hAEL embryonic VNCs (anterior up); brackets outline the three thoracic segments. (C-N) Lateral views of stage 18 hAEL Ap clusters. Arrowheads indicate peptidergic neurons. (F,L) Nplp1 expression is not lost in the Ap clusters, as revealed by proNplp1 staining. (G,M) Staining against FMRFa shows absence of expression in *klu* mutants in Ap4/FMRFa neurons (brackets). (G) By contrast, FMRFa expression in the more anterior and medial SE2 neurons, which are generated by a different neuroblast (Losada-Pérez et al., 2010), is largely unaffected in *klu*. (H,I,L-N) Expression of Eya reveals that the Ap cluster is generated in all thoracic hemisegments in *klu* mutants. (N) Expression of Dimm is numerically reduced within the Ap cluster. Wild-type and mutant VNCs were stained and analyzed on the same slide. (O,P) Summary of the observed phenotypes in C-N. (Q) Number of cells expressing the indicated markers in wild type and *klu* mutants.  $n \geq 10$  VNCs in all genotypes. *P*-value compared with control (Student's *t*-test). Error bars indicate s.d. (C-E,I-K) *OregonR*; (F-H,L-N) *klu*<sup>212IR51C</sup>/*klu*<sup>212IR51C</sup>. NB, neuroblast; GMC, ganglion mother cell; VNC, ventral nerve cord.

Ap cluster (Fig. 1N,P,Q). This reduction was explained by the existence of two Dimm phenotypic groups ( $n=72$  hemisegments): 50% of the clusters were wild type (two Dimm cells/cluster) and 50% had an altered number of Dimm cells (5.5% had three Dimm cells/cluster and 44.4% had one Dimm cell/cluster). However, reduction of FMRFa was equal in both groups, demonstrating that there is no correlation between the FMRFa and Dimm phenotypes. These results highlight that loss-of-function of *klu* produces a selective defect in the differentiation of the Ap4/FMRFa neuron. However, neither NB lineage progression nor Ap1/Nplp1 specification is affected in *klu* embryos.

**Klu is highly expressed in neuroblasts and is not rapidly downregulated during differentiation**

Previous studies have shown that Klu is highly expressed in larval brain type I neuroblasts but is rapidly downregulated in GMCs. In type II lineages, Klu is expressed in the neuroblast but is lost from immature intermediate neural progenitors (INPs), reappearing in mature INPs and disappearing again when the GMCs are formed (Berger et al., 2012; Xiao et al., 2012). We mapped Klu expression in detail in the NB5-6T lineage, focusing on the end of the lineage when the Ap cluster is generated, using an antibody specific to Klu protein (Yang et al., 1997).

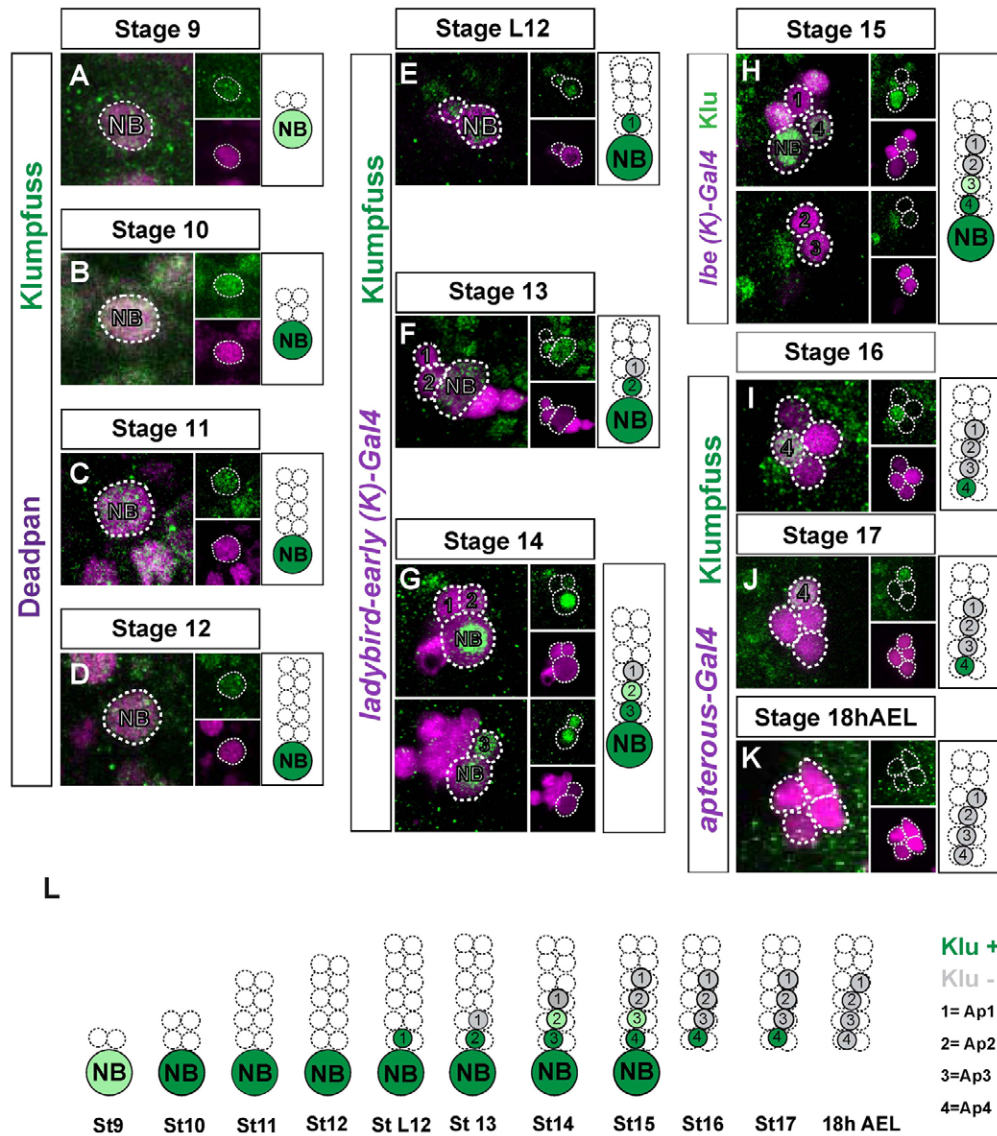

**Fig. 2. Klu expression in the NB5-6T lineage.** Expression of Klu (green) within NB5-6T during embryonic development. To the right are lateral view graphic representations of the lineage. Images are composed from confocal stacks, in G and H subdivided into two substacks, from dorsal (up) to ventral (down). Anterior is up in all images. (A-D) NB5-6T is identified as the anterior-most and lateral-most neuroblast within the *gsb<sup>lacZ</sup>* domain (not shown), as well as by cell size and staining for Deadpan (magenta). (E-H) Alternatively, NB5-6T is identified by reporter gene expression driven from the NB5-6-specific *lbe(K)* enhancer (magenta). Ap1, Ap2, Ap3 and Ap4 neurons are identified by position and different levels of Col (not shown) (Baumgardt et al., 2009). (I-K) During later stages, Ap1, Ap2, Ap3 and Ap4 neurons are identified by expression of *ap-Gal4*>*UAS-GFP* (magenta) and different levels of Cas staining (not shown) (Baumgardt et al., 2009). (A-H) We detect expression of Klu in the neuroblast from stage 9 until the cell cycle exit of NB5-6T at stage 15. (E-K) In the Ap cluster we find that Klu is expressed in the newly born Ap1-Ap3 neurons (E-H). This expression is extinguished shortly afterwards. However, in the Ap4 neuron we also observed Klu expression in the newly born neuron (H), but in this case Klu staining is detected until the end of the stage 17 (J). Finally, at stage 18 hAEL, expression of Klu is no longer evident within the Ap cluster nor in the rest of the VNC (K; not shown). (L) Summary of Klu expression in the NB5-6T lineage. (A-D) *gsb<sup>lacZ</sup>/+*; (E-H) *lbe(K)-Gal4, lbe(K)-Gal4/UAS-nmEGFP*; (I-K) *ap-Gal4/UAS-nmEGFP/+*.

NB5-6T delaminates at late stage 8. During stages 8 and 9 we detected weak expression of Klu (Fig. 2A,L; data not shown). Klu staining became stronger at stage 10, and robust expression of Klu was evident until the cell cycle exit of NB5-6T at stage 15 (Fig. 2B-H,L). In the Ap cluster (generated from late stage 12 until stage 15), Klu was expressed in the newly born Ap1-Ap3 neurons (Fig. 2E-G,L). However, this expression was lost shortly afterwards. This succinct pulse of Klu expression in these newly born Ap neurons correlates well with an inheritance of Klu protein from the neuroblast, but it is incongruent with the urgency of downregulation

of Klu suggested for GMCs (reported both in type I and II lineages) and immature INPs (of type II neuroblasts) (Berger et al., 2012; Xiao et al., 2012). However, the Klu expression profile in Ap4/FMRFa was different. In Ap4, we also observed Klu expression in the newly born neuron (stage 15; Fig. 2H,L), but in this case robust Klu staining was detected until the end of the stage 17 (Fig. 2I,J,L) in the Ap4/FMRFa cell. Finally, at 18 hours after egg-laying (hAEL), expression of Klu was no longer evident in the NB5-6T lineage including the Ap cluster. Similarly, Klu expression was lost from the rest of the VNC (Fig. 2K,L; data not shown).

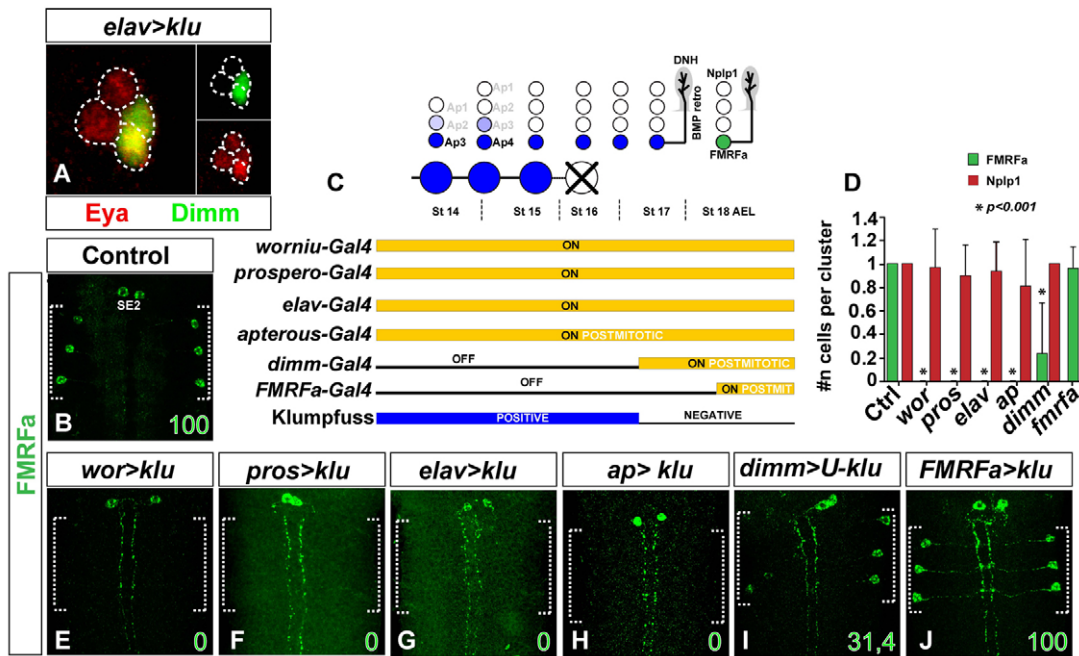

**Fig. 3. Misexpression of *klu* specifically abolishes FMRFa expression in the Ap4 neuron.** (A) Dimm expression is normal in a *klu* misexpression background. (B-E-H) Expression of FMRFa at 18 hAEL in control (B) and with *klu* misexpression from different drivers: (E) *worniu-Gal4*, (F) *prospero-Gal4*, (G) *elav-Gal4* (all of which are expressed in NB5-6T, and their expression persists in the postmitotic Ap4 cell) and (H) *ap-Gal4* (expressed in the postmitotic Ap neurons). In these misexpression contexts FMRFa expression is selectively abolished from the Ap4 neuron. (I,J) Expression of FMRFa at 18 hAEL in a *klu* misexpression background from very late drivers: (I) *dimm-Gal4* (which directs expression into late postmitotic cells, when they acquire the neuropeptidergic fate) and (J) *fmrfa-Gal4* [a late driver directing expression governed by the regulatory sequence of the *FMRFa* gene (Suster et al., 2003)]. Upon misexpression of *klu*, FMRFa expression is reduced from the *dimm-Gal4* driver but is largely unaffected from the very late driver *fmrfa-Gal4*. The percentage of FMRFa-expressing cells is indicated bottom right. (C) Summary of wild-type expression of Klu (blue) and the timing of the drivers used (yellow). (D) Number of cells per cluster expressing FMRFa or Nplp1 in the various genotypes.  $n \geq 30$  hemisegments in all genotypes. *P*-value compared with control (Chi-square test). Error bars indicate s.d. Wild-type and mutant VNCs were stained and analyzed on the same slide. (A) *elav-Gal4>UAS-klu*; (B) *OregonR*; (E) *worniu-Gal4/UAS-klu*; (F) *prospero-Gal4/UAS-klu*; (G) *elav-Gal4/UAS-klu*; (H) *ap-Gal4/UAS-klu*; (I) *dimm-Gal4/UAS-klu*; (J) *fmrfa-Gal4/UAS-klu*. DNH, dorsal neurohemal organ.

### Klu overexpression cannot induce dedifferentiation in mature Ap neurons

The *klu* mutant analysis indicated that loss-of-function of *klu* does not lead to premature differentiation of the NB5-6 lineage. It has been reported that Klu overexpression causes dedifferentiation of immature INPs within larval type II lineages (Berger et al., 2012; Xiao et al., 2012). However, no detectable phenotype was found in larval type I neuroblasts. We therefore asked whether overexpression of *klu* could cause dedifferentiation of mature Ap neurons.

We overexpressed *klu* from different drivers, all of which maintain expression in the postmitotic Ap1-4 cells up to the 18 hAEL stage: *worniu-Gal4*, *prospero-Gal4*, *elav-Gal4* (Fig. 3C-E,G) and *ap-Gal4*, which has previously been shown to direct expression to all four postmitotic cells, including the Ap4 neuron (Fig. 3C,H) (O'Keefe et al., 1998). The four Ap neurons were generated and their number was largely unaffected in all genetic combinations of *klu* overexpression (Fig. 3A; data not shown). To determine whether they retain their terminal differentiation markers we examined the expression of Dimm, Nplp1 and FMRFa. Dimm<sup>+</sup> and Nplp1<sup>+</sup> neurons were numerically unaffected in these genetic backgrounds (Fig. 3A,D). However, overexpression of *klu*, similar to its loss-of-function, produced a selective lack of FMRFa in the Ap4 neuron (Fig. 3D-H). These results indicate that FMRFa expression is specifically and completely lost from all Ap4 neurons when *klu* expression is increased and/or maintained for longer than normal,

whereas other markers typical of mature postmitotic Ap neurons (Eya, Dimm and Nplp1) remain intact. We concluded that *klu* overexpression is unable to induce dedifferentiation in Ap neurons.

Klu is expressed in the newly born Ap4 cell. However, its expression disappears at late stage 17. Together with the overexpression data, this led us to think that *klu* might need to be downregulated in the Ap4 neuron for its proper specification. To test this hypothesis we misexpressed *klu* using late drivers: *dimm-Gal4*, which directs expression into late postmitotic cells, when they acquire the neuropeptidergic fate (Fig. 3C) (Hewes et al., 2003); and *fmrfa-Gal4*, a late driver directing expression by the regulatory sequence of the *fmrfa* gene (Suster et al., 2003); hence, both drivers are expressed when the Ap4 neuron is almost completely specified. The misexpression of *klu* from the *dimm-Gal4* driver allowed partial expression of FMRFa (31%; Fig. 3D,I), whereas *klu* misexpression from *fmrfa-Gal4* did not interfere at all with FMRFa expression (100%; Fig. 3D,J). Together, these observations indicate that there is a transient and critical time window in which *klu* needs to be downregulated for expression of the FMRFa neuropeptide in the Ap4 neuron but not in the SE2 neurons.

### Klu does not regulate Ap neuron determinants

To unravel the role of Klu in the Ap window in more detail, we analyzed the expression of a number of genes crucial for Ap neuron specification. These included the temporal genes *castor* (*cas*; mammalian *Cas21*) and *grainy head* (*grh*; mammalian *Grhl1-3*), as

well as the subtemporal genes *squeeze* [*sqz*; mammalian *CIZ* (*Znf384*)], *nab* (mammalian *Nab1/2*) and *seven up* (*svp*; mammalian *Nr2f1/2*) (Baumgardt et al., 2009; Benito-Sipos et al., 2011; Terriente Félix et al., 2007). We observed no alteration in the expression of these temporal and subtemporal factors (supplementary material Fig. S3A-E,G,H,M,N) in *klu* embryos. Thus, temporal progression in the later part of NB5-6T development is unaffected in *klu* mutants. Similarly, expression of the Ap neuron determinant *collier* [*col*; also known as *knot*; mammalian *Ebf1-4*] (Baumgardt et al., 2009) was unaffected in *klu* mutants (supplementary material Fig. S3L-N). We conclude that *klu* does not regulate the Ap neuron determinants *cas*, *grh*, *sqz*, *nab*, *svp* and *col*.

**BMP signaling is interrupted in *klu* mutants**

Having analyzed most of the genes identified as being crucial for specification of the Ap4/FMRFa cell fate, none of which was altered in *klu* mutants, the question arises as to why FMRFa is lost in *klu* mutants?

FMRFa expression in the Ap4 neuron is dependent on a retrograde instructive signal provided by target-derived transforming growth factor  $\beta$  (TGF $\beta$ )/bone morphogenetic protein (BMP) (Allan et al., 2003; Marqués et al., 2003). The Ap4 neuron innervates a peripheral secretory gland, the dorsal neurohemal organ (DNH), where it receives the TGF $\beta$ /BMP ligand Glass bottom boat (Gbb), which finally triggers expression of the *FMRFa* neuropeptide gene. In *Drosophila*, BMP signaling leads to the

phosphorylation and nuclear translocation of the Smad protein Mothers against dpp (Mad), which can be monitored using antibodies specific to phosphorylated Mad (pMad) (Dorfman and Shilo, 2001; Marqués et al., 2003; Tanimoto et al., 2000). Target-derived BMP signaling is also known to occur in most, if not all, motoneurons in the VNC (Aberle et al., 2002). Hence, we used a specific antibody to pMad to assay for BMP activation in Ap4 neurons in a *klu* mutant background. Whereas there was no obvious loss of pMad staining in the VNC in general (data not shown), loss of pMad staining was prevalent in the Ap4 neuron (Fig. 4B,E). In addition, absence of FMRFa was always associated with an absence of Ap4 pMad staining (100%; Fig. 4B). Of note, the lack of FMRFa associated with the overexpression of *klu* is not explained by an absence of pMad (supplementary material Fig. S1).

Why is BMP signaling interrupted in *klu* mutants? The loss of pMad could reflect an absence of the target gland, the DNH itself. When revealed by *btn-lacZ* expression (Allan et al., 2003), we found an apparently normal DNH in *klu* mutants (Fig. 4D). Another possibility is a failure of the Ap4/FMRFa neuron to project its axon to the DNH, with an accompanying failure to receive the TGF $\beta$ /BMP ligand Gbb. When we analyzed and quantified the innervation of the Ap4/FMRFa neuron in *klu* mutants, no statistically significant differences were found between controls and *klu* mutants in DNH innervation (Fig. 4D,F).

Since the Ap4/FMRFa neuron properly innervates its target gland in *klu* mutants, we addressed a possible role for *klu* in the

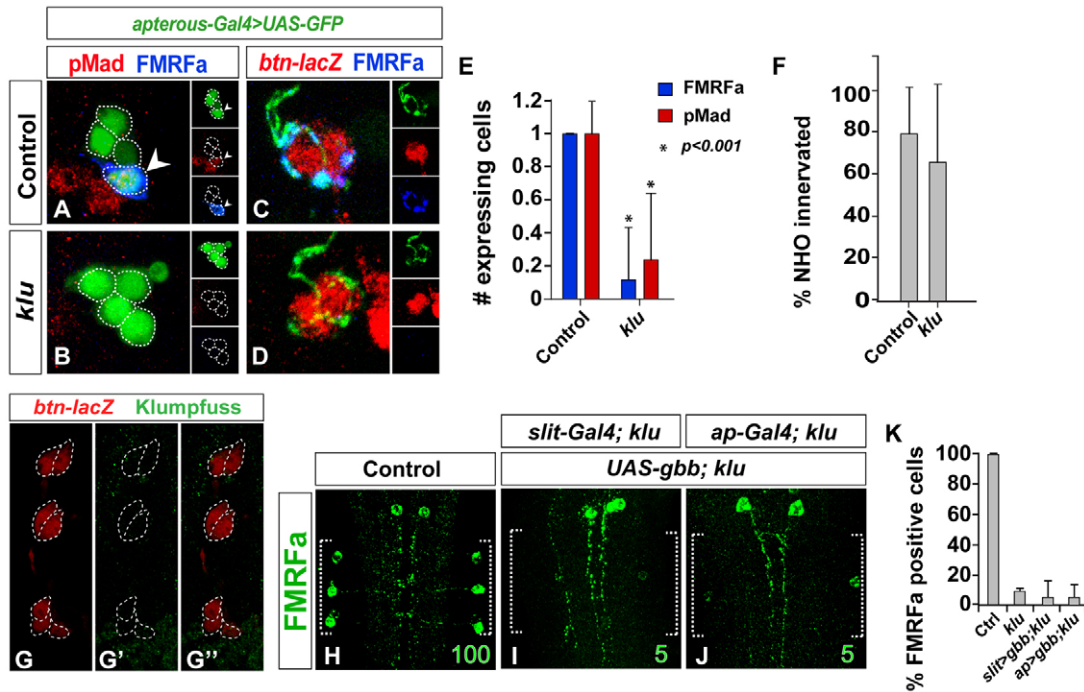

**Fig. 4. BMP signaling is interrupted in Ap4 neurons in *klu* mutants.** (A,B) pMad staining at 18 hAEL in control (A) and *klu* mutant (B). pMad staining is lost in *klu* mutants. Arrowhead (A) indicates Ap4 neuron. (C,D) Overlap of *btn-lacZ* (red), *ap-Gal4>UAS-nmEGFP* (green) and FMRFa (blue) at 18 hAEL in control (C) and *klu* mutant (D). There are no gross differences between controls and *klu* mutants in DNH innervation. (E) Number of cells expressing FMRFa or showing pMad in controls and *klu* mutants.  $n \geq 35$  hemisegments. *P*-value compared with control (Chi-square test). Error bars indicate s.d. (F) Quantification of innervation of the Ap4/FMRFa neuron in *klu* mutants.  $P > 0.001$  (Student's *t*-test). (G-G'') Overlap of *btn-lacZ* (red) and Klu (green) at 18 hAEL. Klu staining is not detected in the DNH. (H-J) Expression of FMRFa at 18 hAEL in control (H) and *klu* mutants expressing *gbb* directly in the DNH (I) and *klu* mutants expressing *gbb* directly in the Ap4 neuron itself (J). There is no rescue of FMRFa expression in these genetic backgrounds. The percentage of FMRFa-expressing cells is indicated bottom right. (K) Percentage FMRFa-expressing cells in the various genotypes.  $n \geq 10$  VNCs. Wild-type and mutant VNCs were stained and analyzed on the same slide. (A) *ap-Gal4/UAS-nmEGFP*; (B) *ap-Gal4/UAS-nmEGFP; klu<sup>212IR51C</sup>/klu<sup>212IR51C</sup>*; (C) *ap-Gal4/UAS-nmEGF;btn-lacZ*; (D) *ap-Gal4,btn-lacZ; klu<sup>212IR51C</sup>/klu<sup>212IR51C</sup>*; (E) *btn-lacZ*; (G) *OregonR*; (H) *slit-Gal4,UAS-gbb; klu<sup>212IR51C</sup>/klu<sup>212IR51C</sup>*; (I) *ap-Gal4,UAS-gbb; klu<sup>212IR51C</sup>/klu<sup>212IR51C</sup>*.

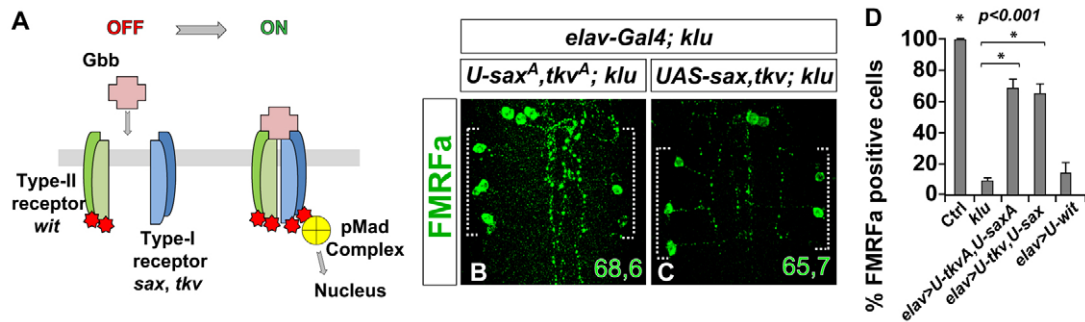

**Fig. 5. *Klu* regulates the expression of type I BMP receptors in the Ap4/FMRFa neuron.** (A) The BMP pathway in the Ap4 neuron (see Allan et al., 2003; Marqués et al., 2003). (B,C) Expression of FMRFa at 18 hAEL in *klu* mutants co-expressing the activated (B) or wild-type (C) *sax* and *tkv* receptors. Both genetic combinations result in rescue of FMRFa expression in *klu* mutants (68.6% and 65.7%, respectively; in the co-expression of activated *sax* and *tkv* receptors we observed ectopic FMRFa-expressing cells in the Ap cluster, but these were not included in the quantification of the rescue). (D) Percentage FMRFa-expressing cells in the various genotypes.  $n \geq 10$  hemisegments. *P*-value compared with the mutant (Mann-Whitney U-test). Error bars indicate s.d. Wild-type and mutant VNCs were stained and analyzed on the same slide. (B,D) *elav-Gal4/UAS-sax<sup>A</sup>, UAS-tkv<sup>A</sup>; klu<sup>212IR51C</sup>/klu<sup>212IR51C</sup>*; (C,D) *elav-Gal4/UAS-sax, UAS-tkv; klu<sup>212IR51C</sup>/klu<sup>212IR51C</sup>*. (D) *Orizo2, klu<sup>212IR51C</sup>/klu<sup>212IR51C</sup>, elav-Gal4/UAS-wit; klu<sup>212IR51C</sup>/klu<sup>212IR51C</sup>*.

specification of the DNH itself, which could result in the absence of Gbb in this gland. Although we did not observe *Klu* expression in the DNH (Fig. 4G), it is possible that *klu* plays an early role in DNH specification. To circumvent this issue, we attempted to rescue FMRFa in *klu* mutants by providing *gbb* directly to the DNH (*slit-Gal4>UAS-gbb* in the *klu* mutant). However, this failed to restore FMRFa expression (Fig. 4I,K). Hence, these results lead to the conclusion that the Ap4 neuron is unable to respond to Gbb. To test this, we provided *gbb* in the Ap4 neuron itself using *ap-Gal4/UAS-gbb* in *klu* mutants [previous studies reported that the misexpression of *gbb* rescues *gbb* mutants cell-autonomously (Allan et al., 2003)]. However, we found no rescue of FMRFa in this genetic background (Fig. 4J,K). Thus, the Ap4 neuron is not competent to respond to the Gbb ligand in *klu* mutants.

### Expression of type I BMP receptors rescues FMRFa expression in the Ap4/FMRFa neuron

In the Ap4/FMRFa cell, activation of the BMP pathway begins when the ligand Gbb binds to a tetrameric membrane receptor complex that consists of two receptor pairs – the type I and type II BMP receptors (Allan et al., 2003). Then, the constitutively active type II BMP receptors [*wishful thinking* (*wit*)] recruit and then phosphorylate their type I BMP partners [*saxophone* (*sax*) and *thickveins* (*tkv*)]. The type I receptors in turn phosphorylate the cytoplasmic receptor-regulated Smad (R-Smad) Mad. The R-Smad Mad then associates with common non-phosphorylated Smads (co-Smads) (Medea in *Drosophila*) to form a phospho-Mad complex (pMad) that translocates to the nucleus to participate in transcriptional regulation (Fig. 5A) (reviewed by Keshishian and Kim, 2004).

Why then is the Ap4 neuron unable to respond to the Gbb ligand in *klu* mutants? To address this issue, we examined whether constitutive activation of the BMP pathway is able to rescue FMRFa expression in *klu* mutants. In *Drosophila*, constitutive activation of the BMP pathway can be achieved by expression of activated versions of either one of the type I receptors *sax* or *tkv* [*UAS-saxA* and *UAS-tkvA* (Haerry et al., 1998)]. Is the *klu* mutant Ap4 neuron able to transduce the signal from activated type I BMP receptors? Using *elav-Gal4*, we expressed these modified receptors and found that this resulted in a 68% rescue of FMRFa (Fig. 5B,D). We also observed ectopic FMRFa-expressing cells in the Ap cluster. These results indicate that *klu* mutant Ap4/FMRFa neurons are defective in their response to the Gbb ligand.

To initiate downstream responses, the type I BMP receptors need to be recruited and phosphorylated by the type II receptor Wit, and this phosphorylation step is activated by binding of the BMP ligand to the type I BMP receptors in the receptor complex. Therefore, expression of constitutively active forms of the type I BMP receptors *Sax* and *Tkv* bypasses the need for the type II receptor Wit, whereas the expression of normal forms of these receptors does not. To determine whether the *klu* phenotype is due to type I or type II BMP receptors, we first tested the involvement of the type II receptor *wit* by expressing the wild-type versions of the type I BMP receptors (*elav>sax, tkv* in the *klu* mutant). Even in this scenario, we found a similar rescue of FMRFa expression in *klu* mutants (66%; Fig. 5C,D), demonstrating that type I and not type II receptors are at the core of the *klu* phenotype of the Ap/FMRFa neuron. To test this notion further, we attempted to rescue FMRFa expression in *klu* mutants by expressing the type II receptor Wit (*elavG4>UAS-wit* in the *klu* mutant). However, we found no statistically significant rescue in this genetic background (Fig. 5D). Thus, our results indicate that *klu* controls, directly or indirectly, the levels or responsiveness of the plasma membrane-bound type I BMP receptors in the Ap4/FMRFa neuron.

### None of the known Ap neuron determinants controls *Klu* expression

Next, we addressed the activation of *klu* at the very end of the NB5-6T lineage, when the Ap4/FMRFa neuron is generated. Given that we cannot rule out the possibility that the Ap4 neuron expresses *Klu* due to inheritance from the neuroblast, we examined *Klu* expression both within the neuroblast at stage late 14 (when the neuroblast is generating the Ap4 cell) and within the whole Ap cluster. In those mutants in which the Ap and *Eya* markers are lost, we used the *lbe(K)* reporter, and we identified the Ap cluster by position. Mutants for the *cas*, *nab* and *sqz* temporal/subtemporal genes had no apparent change in *Klu* expression (supplementary material Fig. S2A,B,F-I,Q-S). *grh* and *svp* mutants displayed an increase in the number of Ap neurons (Baumgardt et al., 2009; Benito-Sipos et al., 2011) and, accordingly, there was an increase in Ap neurons expressing *Klu* at stage 16 (supplementary material Fig. S2D,K,Q-S). However, *Klu* expression was turned off normally at 18 hAEL in both mutants (supplementary material Fig. S2E,L,Q-S). We concluded that the increase in *Klu*-positive neurons displayed by *grh* and *svp* embryos merely reflects the increase in the number of Ap neurons.

Finally, we studied Klu expression in mutants for the *col*, *ap* and *eya* determinants, but observed no apparent global effect upon Klu expression in these mutant backgrounds (supplementary material Fig. S2M-S). Therefore, none of the reported Ap neuron determinants controls Klu expression, and the factor(s) involved in the Klu activation remain(s) elusive.

## DISCUSSION

We find that Klu is expressed in the newly born Ap4/FMRFa neuron and that this expression is maintained until the end of stage 17. Our results demonstrate that the key role of Klu in this scenario is in the control of type I BMP receptor expression. Nevertheless, our findings indicate a pleiotropic function of Klu in Ap cluster specification in general and particularly in Ap4 neuron differentiation, indicating that Klu is a multitasking transcription factor. Finally, we found that transient suppression of *klu* is crucial for specification of the Ap4/FMRFa neuron. These results unravel a new and non-canonical role of Klu in neural cell specification.

### A novel role of Klu in neural cell specification

Previous studies carried out in the NB4-2 lineage reported that Klu prevents the second-born daughter cell in that lineage (GMC4-2b) from adopting the GMC4-2a fate (Yang et al., 1997). This is achieved by repressing *eve* expression in GMC4-2b, and loss of *klu* expression leads to a duplication of GMC4-2a fate. However, owing to the limited availability of lineage markers, the role of Klu in both later born GMCs in the NB4-2 lineage and other NB lineages has not been examined (Klein and Campos-Ortega, 1997; McDonald et al., 2003; Yang et al., 1997). Recent studies pinpoint the transcription factor Klu as distinguishing a type II neuroblast from an INP in larval brain. Klu functions to maintain the identity of type II neuroblasts, and *klu* mutant larval brains show progressive loss of type II neuroblasts due to premature differentiation (Xiao et al., 2012). Additionally, studies from sensory organ precursors (SOPs) suggest a similar mechanism of action: overexpression of Klu results in the formation of supernumerary bristles, whereas loss-of-function leads to loss of bristles due to the lack of determination of the corresponding SOP (Kaspar et al., 2008). Hence, all previous data concerning Klu indicate that it distinguishes between two fates ('A' versus 'B'). In all these cases, loss-of-function of *klu* produces extra cells with identity 'A', whereas gain-of-function of *klu* produces extra cells with identity 'B'.

However, our studies of NB5-6 reveal a different role for Klu. Loss- and gain-of-function of *klu* do not permute identity within the lineage (as the canonical role of *klu* would predict). On the contrary, Klu is necessary for the proper initiation of one of the components of the combinatorial code necessary for Ap4/FMRFa specification: BMP signaling. Importantly, neither BMP signaling nor Klu is sufficient to activate FMRFa expression in other Ap neurons. Therefore, our results highlight a novel function of the transcription factor Klu in neural cell specification.

### Klu, like its mammalian ortholog WT1, has self-renewal or differentiation functions during development depending on context

*klu* encodes a transcriptional regulator characterized by four zinc-finger motifs in the C-terminus and is the fly ortholog of mammalian *WT1* (Klein and Campos-Ortega, 1997; Yang et al., 1997). Inconsistent and contradictory functions have been ascribed to WT1, which can act as a transcriptional activator or repressor, promoting proliferation, differentiation or apoptosis, in a highly context-dependent manner. In mammals, mutations in *WT1* result in tumor formation, and WT1 has also been found necessary for the

proliferation of certain neuronal progenitors (reviewed by Hohenstein and Hastie, 2006; Roberts, 2005), which is in line with the reported role of Klu in self-renewal. By contrast, WT1 has also been identified in differentiation process, such as playing an essential role in nephron progenitor differentiation during renal development (reviewed by Hohenstein and Hastie, 2006; Roberts, 2005) and participating in the differentiation of the olfactory epithelium (Wagner et al., 2005), in agreement with the role of Klu reported here. Therefore, our findings indicate that Klu, like WT1, has either self-renewal or differentiation functions during development depending on context.

### Klu is required for the onset, but not for the maintenance, of BMP signaling within the Ap4 neuron

We have undertaken a number of experiments involving different markers, mutant combinations and a detailed analysis of Klu with respect to the FMRFa phenotype within the Ap cluster. Our findings reveal that at the heart of the *klu* phenotype in the Ap4/FMRFa neuron lay defects in BMP signaling. Previous studies reported that FMRFa expression is maintained by persistent retrograde BMP signaling in the Ap4 neuron (Eade and Allan, 2009). Here, we find that *klu* is a crucial regulator of BMP signaling. However, Klu expression is extinguished at the end of stage 17. Hence, Klu is necessary for the initiation of BMP signaling but is dispensable for its maintenance within the Ap4 neuron. Further investigation will be necessary to elucidate the molecular function of *klu* in controlling the expression of type I BMP receptors.

Is the control of BMP signaling a global/conserved function of Klu? *klu* mutants do not display a general absence of pMad staining within the whole VNC (data not shown). Hence, although we cannot rule out global control of type I BMP receptors by *klu*, its role does seem to be highly context dependent. Additionally, previous studies by ChIP-chip in embryonic mouse kidney tissue identified transcriptional targets of WT1 in nephron progenitor cells during renal development *in vivo*. Among these targets they found several components of the BMP signaling pathway: *Bmp4*, *Bmp7*, the two R-Smads *Smad3* and *Smad4*, and the two inhibitory Smads (I-Smads) *Smad6* and *Smad7*. However, none of the BMP receptors was found. Hence, although WT1 has been associated with the control of BMP signaling, the mechanisms underlying this control seem to be multiple and highly cell specific. Intriguingly, in those studies, *Nab1* and *Nab2*, the mammalian orthologs of the subtemporal factor Nab, were also found to be targets of WT1. Here, we found in *Drosophila* that Nab expression was unaffected by loss-of-function of *klu*.

### Acknowledgements

We thank M. Pita, M. O'Connor, C. Klämbt, P. Taghert, W. Chia, M. Baumgardt, J. Skeath, W. Odenwald, T. Isshiki, the Developmental Studies Hybridoma Bank at the University of Iowa (Iowa City, IA, USA) and The Bloomington Stock Center for sharing antibodies and fly lines; and Carlos Sánchez, Verónica Labrador and Angeles Muñoz for technical assistance in confocal microscopy.

### Funding

This work was supported by a grant from the Spanish Ministerio de Ciencia e Innovación [BFU-2008-04683-C02-02] to L.T.; and by the Swedish Research Council, the Swedish Strategic Research Foundation, the Knut and Alice Wallenberg Foundation, the Swedish Brain Foundation, the Swedish Cancer Foundation and the Swedish Royal Academy of Sciences to S.T.

### Competing interests statement

The authors declare no competing financial interests.

### Supplementary material

Supplementary material available online at <http://dev.biologists.org/lookup/suppl/doi:10.1242/dev.089748/-DC1>



## References

- Aberle, H., Haghghi, A. P., Fetter, R. D., McCabe, B. D., Magalhães, T. R. and Goodman, C. S. (2002). wishful thinking encodes a BMP type II receptor that regulates synaptic growth in *Drosophila*. *Neuron* **33**, 545-558.
- Albagli, O., Klaes, A., Ferreira, E., Leprince, D. and Klambt, C. (1996). Function of *ets* genes is conserved between vertebrates and *Drosophila*. *Mech. Dev.* **59**, 29-40.
- Albertson, R. and Doe, C. Q. (2003). Dlg, Scrib and Lgl regulate neuroblast cell size and mitotic spindle asymmetry. *Nat. Cell Biol.* **5**, 166-170.
- Allan, D. W., St Pierre, S. E., Miguel-Aliaga, I. and Thor, S. (2003). Specification of neuropeptide cell identity by the integration of retrograde BMP signaling and a combinatorial transcription factor code. *Cell* **113**, 73-86.
- Allan, D. W., Park, D., St Pierre, S. E., Taghert, P. H. and Thor, S. (2005). Regulators acting in combinatorial codes also act independently in single differentiating neurons. *Neuron* **45**, 689-700.
- Baumgardt, M., Miguel-Aliaga, I., Karlsson, D., Ekman, H. and Thor, S. (2007). Specification of neuronal identities by feedforward combinatorial coding. *PLoS Biol.* **5**, e37.
- Baumgardt, M., Karlsson, D., Terriente, J., Díaz-Benjumea, F. J. and Thor, S. (2009). Neuronal subtype specification within a lineage by opposing temporal feed-forward loops. *Cell* **139**, 969-982.
- Benito-Sipos, J., Ulvko, C., Gabilondo, H., Baumgardt, M., Angel, A., Torroja, L. and Thor, S. (2011). Seven up acts as a temporal factor during two different stages of neuroblast 5-6 development. *Development* **138**, 5311-5320.
- Benveniste, R. J., Thor, S., Thomas, J. B. and Taghert, P. H. (1998). Cell type-specific regulation of the *Drosophila* FMRf-NH2 neuropeptide gene by Apterous, a LIM homeodomain transcription factor. *Development* **125**, 4757-4765.
- Berger, C., Harzer, H., Burkard, T. R., Steinmann, J., van der Horst, S., Laurenson, A. S., Novatchkova, M., Reichert, H. and Knoblich, J. A. (2012). FACS purification and transcriptome analysis of *Drosophila* neural stem cells reveals a role for Klumpfuss in self-renewal. *Cell Rep.* **2**, 407-418.
- Brody, T., Stivers, C., Nagle, J. and Odenwald, W. F. (2002). Identification of novel *Drosophila* neural precursor genes using a differential embryonic head cDNA screen. *Mech. Dev.* **113**, 41-59.
- Buenzow, D. E. and Holmgren, R. (1995). Expression of the *Drosophila* gooseberry locus defines a subset of neuroblast lineages in the central nervous system. *Dev. Biol.* **170**, 338-349.
- Cheah, P. Y., Chia, W. and Yang, X. (2000). Jumeaux, a novel *Drosophila* winged-helix family protein, is required for generating asymmetric sibling neuronal cell fates. *Development* **127**, 3325-3335.
- Crozatier, M. and Vincent, A. (1999). Requirement for the *Drosophila* COE transcription factor Collier in formation of an embryonic muscle: transcriptional response to notch signalling. *Development* **126**, 1495-1504.
- De Graeve, F., Jagla, T., Daponte, J. P., Rickert, C., Dastugue, B., Urban, J. and Jagla, K. (2004). The ladybird homeobox genes are essential for the specification of a subpopulation of neural cells. *Dev. Biol.* **270**, 122-134.
- DiAntonio, A., Haghghi, A. P., Portman, S. L., Lee, J. D., Amaranto, A. M. and Goodman, C. S. (2001). Ubiquitination-dependent mechanisms regulate synaptic growth and function. *Nature* **412**, 449-452.
- Dorfman, R. and Shilo, B. Z. (2001). Biphasic activation of the BMP pathway patterns the *Drosophila* embryonic dorsal region. *Development* **128**, 965-972.
- Duman-Scheel, M., Li, X., Orlov, I., Noll, M. and Patel, N. H. (1997). Genetic separation of the neural and cuticular patterning functions of gooseberry. *Development* **124**, 2855-2865.
- Eade, K. T. and Allan, D. W. (2009). Neuronal phenotype in the mature nervous system is maintained by persistent retrograde bone morphogenetic protein signaling. *J. Neurosci.* **29**, 3852-3864.
- Gabilondo, H., Losada-Pérez, M., del Saz, D., Molina, I., León, Y., Canal, I., Torroja, L. and Benito-Sipos, J. (2011). A targeted genetic screen identifies crucial players in the specification of the *Drosophila* abdominal Capaergic neurons. *Mech. Dev.* **128**, 208-221.
- Gutjahr, T., Patel, N. H., Li, X., Goodman, C. S. and Noll, M. (1993). Analysis of the gooseberry locus in *Drosophila* embryos: gooseberry determines the cuticular pattern and activates gooseberry neuro. *Development* **118**, 21-31.
- Haerry, T. E., Khalsa, O., O'Connor, M. B. and Wharton, K. A. (1998). Synergistic signaling by two BMP ligands through the SAX and TKV receptors controls wing growth and patterning in *Drosophila*. *Development* **125**, 3977-3987.
- Hamanaka, Y., Park, D., Yin, P., Annangudi, S. P., Edwards, T. N., Sweedler, J., Meinertzhagen, I. A. and Taghert, P. H. (2010). Transcriptional orchestration of the regulated secretory pathway in neurons by the bHLH protein DIMM. *Curr. Biol.* **20**, 9-18.
- Hemphala, J., Uv, A., Cantera, R., Bray, S. and Samakovlis, C. (2003). Grainy head controls apical membrane growth and tube elongation in response to Branchless/FGF signalling. *Development* **130**, 249-58.
- Hewes, R. S., Park, D., Gauthier, S. A., Schaefer, A. M. and Taghert, P. H. (2003). The bHLH protein Dimmed controls neuroendocrine cell differentiation in *Drosophila*. *Development* **130**, 1771-1781.
- Hohenstein, P. and Hastie, N. D. (2006). The many facets of the Wilms' tumour gene, WT1. *Hum. Mol. Genet.* **15** Suppl. 2, R196-R201.
- Isshiki, T., Pearson, B., Holbrook, S. and Doe, C. Q. (2001). *Drosophila* neuroblasts sequentially express transcription factors which specify the temporal identity of their neuronal progeny. *Cell* **106**, 511-521.
- Kanai, M. I., Okabe, M. and Hiromi, Y. (2005). Seven-up controls switching of transcription factors that specify temporal identities of *Drosophila* neuroblasts. *Dev. Cell* **8**, 203-213.
- Kaspar, M., Schneider, M., Chia, W. and Klein, T. (2008). Klumpfuss is involved in the determination of sensory organ precursors in *Drosophila*. *Dev. Biol.* **324**, 177-191.
- Keshishian, H. and Kim, Y. S. (2004). Orchestrating development and function: retrograde BMP signaling in the *Drosophila* nervous system. *Trends Neurosci.* **27**, 143-147.
- Klein, T. and Campos-Ortega, J. A. (1997). Klumpfuss, a *Drosophila* gene encoding a member of the EGR family of transcription factors, is involved in bristle and leg development. *Development* **124**, 3123-3134.
- Lee, T. and Luo, L. (1999). Mosaic analysis with a repressible cell marker for studies of gene function in neuronal morphogenesis. *Neuron* **22**, 451-461.
- Losada-Pérez, M., Gabilondo, H., del Saz, D., Baumgardt, M., Molina, I., León, Y., Monedero, I., Díaz-Benjumea, F., Torroja, L. and Benito-Sipos, J. (2010). Lineage-unrelated neurons generated in different temporal windows and expressing different combinatorial codes can converge in the activation of the same terminal differentiation gene. *Mech. Dev.* **127**, 458-471.
- Lundgren, J., Masson, P., Mirzaei, Z. and Young, P. (2005). Identification and characterization of a *Drosophila* proteasome regulatory network. *Mol. Cell. Biol.* **25**, 4662-4675.
- Marqués, G., Haerry, T. E., Crotty, M. L., Xue, M., Zhang, B. and O'Connor, M. B. (2003). Retrograde Gbb signaling through the Bmp type 2 receptor wishful thinking regulates systemic FMRf expression in *Drosophila*. *Development* **130**, 5457-5470.
- McDonald, J. A., Fujioka, M., Odden, J. P., Jaynes, J. B. and Doe, C. Q. (2003). Specification of motoneuron fate in *Drosophila*: integration of positive and negative transcription factor inputs by a minimal eve enhancer. *J. Neurobiol.* **57**, 193-203.
- Mellerick, D. M., Kassis, J. A., Zhang, S. D. and Odenwald, W. F. (1992). Castor encodes a novel zinc finger protein required for the development of a subset of CNS neurons in *Drosophila*. *Neuron* **9**, 789-803.
- Miguel-Aliaga, I. and Thor, S. (2004). Segment-specific prevention of pioneer neuron apoptosis by cell-autonomous, postmitotic Hox gene activity. *Development* **131**, 6093-6105.
- Nusslein-Volhard, C., Wieschaus, E. and Kluding, H. (1984). Mutations affecting the pattern of the larval cuticle in *Drosophila melanogaster*. *Roux's Arch. Dev. Biol.* **193**, 267-282.
- O'Keefe, D. D., Thor, S. and Thomas, J. B. (1998). Function and specificity of LIM domains in *Drosophila* nervous system and wing development. *Development* **125**, 3915-3923.
- Park, D., Han, M., Kim, Y. C., Han, K. A. and Taghert, P. H. (2004). Ap-let neurons – a peptidergic circuit potentially controlling ecdysial behavior in *Drosophila*. *Dev. Biol.* **269**, 95-108.
- Park, D., Veenstra, J. A., Park, J. H. and Taghert, P. H. (2008). Mapping peptidergic cells in *Drosophila*: where DIMM fits in. *PLoS ONE* **3**, e1896.
- Pignoni, F., Hu, B., Zavitz, K. H., Xiao, J., Garrity, P. A. and Zipursky, S. L. (1997). The eye-specification proteins So and Eya form a complex and regulate multiple steps in *Drosophila* eye development. *Cell* **91**, 881-891.
- Roberts, S. G. (2005). Transcriptional regulation by WT1 in development. *Curr. Opin. Genet. Dev.* **15**, 542-547.
- Skeath, J. B., Zhang, Y., Holmgren, R., Carroll, S. B. and Doe, C. Q. (1995). Specification of neuroblast identity in the *Drosophila* embryonic central nervous system by gooseberry-distal. *Nature* **376**, 427-430.
- Suster, M. L., Martin, J. R., Sung, C. and Robinow, S. (2003). Targeted expression of tetanus toxin reveals sets of neurons involved in larval locomotion in *Drosophila*. *J. Neurobiol.* **55**, 233-246.
- Tanimoto, H., Itoh, S., ten Dijke, P. and Tabata, T. (2000). Hedgehog creates a gradient of DPP activity in *Drosophila* wing imaginal discs. *Mol. Cell* **5**, 59-71.
- Terriente Félix, J., Magariños, M. and Díaz-Benjumea, F. J. (2007). Nab controls the activity of the zinc-finger transcription factors Squeeze and Rotund in *Drosophila* development. *Development* **134**, 1845-1852.
- Wagner, N., Wagner, K. D., Hammes, A., Kirschner, K. M., Vidal, V. P., Schedl, A. and Scholz, H. (2005). A splice variant of the Wilms' tumour suppressor WT1 is required for normal development of the olfactory system. *Development* **132**, 1327-1336.
- Xiao, Q., Komori, H. and Lee, C. Y. (2012). Klumpfuss distinguishes stem cells from progenitor cells during asymmetric neuroblast division. *Development* **139**, 2670-2680.
- Yang, X., Bahri, S., Klein, T. and Chia, W. (1997). Klumpfuss, a putative *Drosophila* zinc finger transcription factor, acts to differentiate between the identities of two secondary precursor cells within one neuroblast lineage. *Genes Dev.* **11**, 1396-1408.
